# Supplementary material for: A One-Step Extraction and Luminescence Assay for Quantifying Glucose and ATP Levels in Cultured HepG2 Cells
Source: PubMed Central journal article supplement (PMC6163413; doi:10.3390/ijms19092670), 2018-09-08
Supplement: ijms-19-02670-s001.pdf [file ijms-19-02670-s001.pdf]

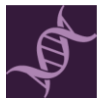

Supplementary Material

# A One-Step Extraction and Luminescence Assay for Quantifying Glucose and ATP Levels in Cultured HepG2 Cells

Rita Csepregi <sup>1,3</sup>, Viktória Temesfői <sup>1,3</sup>, Nikolett Sali <sup>1</sup>, Miklós Poór <sup>2,3</sup>, Paul W. Needs <sup>4</sup>, Paul A. Kroon <sup>4</sup>, and Tamás Kőszegi <sup>1,3\*</sup>

<sup>1</sup> Department of Laboratory Medicine, University of Pécs, Medical School, H-7624 Pécs, Ifjúság u. 13, Hungary; ritacsepregi93@gmail.com (R.C.); vtemesfoi@gmail.com (V.T.); niki26@gmail.hu (N.S.)

<sup>2</sup> Department of Pharmacology, University of Pécs, Faculty of Pharmacy, H-7624 Pécs, Szigeti u. 12, Hungary; poor.miklos@pte.hu (M.P.)

<sup>3</sup> János Szentágotthai Research Center, H-7624 Pécs, Ifjúság u. 20, Hungary

<sup>4</sup> Quadram Institute Bioscience, Norwich Research Park, Norwich NR4 7UA, UK; paul.needs@quadram.ac.uk (P.N.); paul.kroon@quadram.ac.uk (P.K.)

\* Correspondence: tamas.koszegi@aok.pte.hu; Tel.: +36-30-491-7719; Fax: +36-72-536-121

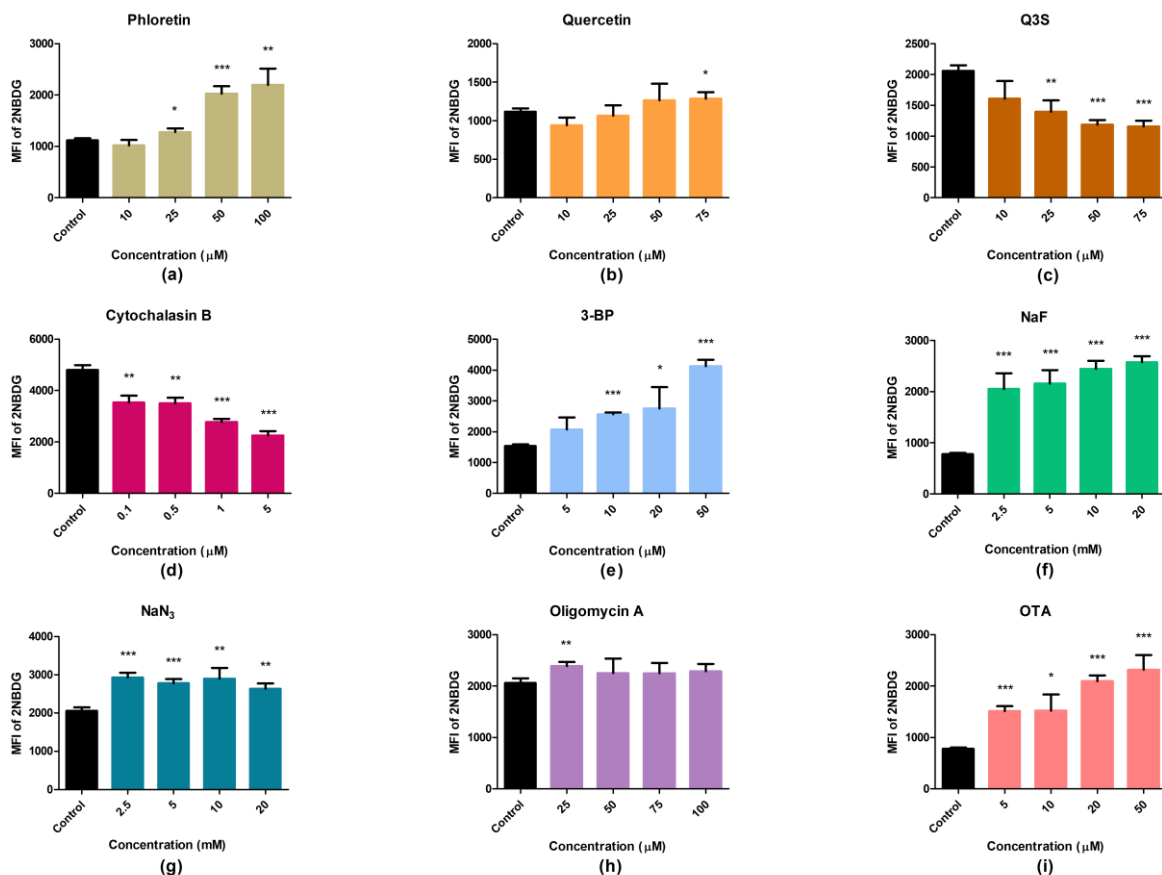

**Supplementary Figure 1.** 2-NBDG uptake in HepG2 cells as results of (a) phloretin, (b) quercetin, (c) Q3'S, (d) cytochalasin B, (e) 3-BP, (f) NaF, (g) NaN<sub>3</sub>, (h) oligomycin A, and (i) OTA treatments. Incubation time with metabolic inhibitors: 4 h, 2-NBDG: 1 h, MFI: mean fluorescence intensity. Columns represent the mean of medians, error bars show the interquartile range of fluorescence intensity of intracellular 2-NBDG. PI positive cells are included into the analysis. (\*  $p < 0.05$ , \*\*  $p < 0.01$  \*\*\*  $p < 0.001$  compared with the controls).
